# 1 **Glycerol-driven Denitrataion: Process Kinetics,** 2 **Microbial Ecology, and Operational Controls**

3  
4 AUTHOR NAMES: *Matthew P. Baideme*,<sup>a,#</sup> *Chenghua Long*,<sup>a</sup> *Luke T. Plante*,<sup>a,b</sup> *Jeffrey A.*  
5 *Starke*,<sup>b,1</sup> *Michael A. Butkus*,<sup>b</sup> and *Kartik Chandran*<sup>a,\*</sup>

6  
7 AUTHOR AFFILIATIONS:

8 <sup>a</sup> Department of Earth and Environmental Engineering, Columbia University, New York, NY  
9 10027, U.S.A.

10 <sup>b</sup> Department of Geography and Environmental Engineering, United States Military Academy,  
11 West Point, NY 10996, U.S.A.

12 <sup>1</sup> Present address: Opus College of Engineering, Marquette University, Milwaukee, WI 53201,  
13 U.S.A.

14 <sup>#</sup> Co-corresponding author: Department of Earth and Environmental Engineering, Columbia  
15 University, 500 W. 120th St., New York, NY 10027. Email: [mpb2177@columbia.edu](mailto:mpb2177@columbia.edu).

16 <sup>\*</sup> Co-corresponding author: Department of Earth and Environmental Engineering, Columbia  
17 University, 500 W. 120th St., New York, NY 10027. Email: [kc2288@columbia.edu](mailto:kc2288@columbia.edu). Phone:  
18 212.854.9027. Fax: 212.854.7081.

19  
20 ABSTRACT: Denitrataion, the selective reduction of nitrate to nitrite, is a novel process when  
21 coupled with anaerobic ammonium oxidation (anammox) could achieve resource-efficient  
22 biological nitrogen removal of ammonium- and nitrate-laden waste streams. Using a

23 fundamentally-based, first principles approach, this study optimized a stoichiometrically-limited,  
24 glycerol-driven denitratation process and characterized mechanisms supporting nitrite  
25 accumulation with results that aligned with expectations. Glycerol supported selective nitrate  
26 reduction to nitrite and near-complete nitrate conversion, indicating its viability in a denitratation  
27 system. Glycerol-supported specific rates of nitrate reduction (135.3 mg-N/g-VSS/h) were at  
28 least one order of magnitude greater than specific rates of nitrite reduction (14.9 mg-N/g-VSS/h),  
29 potentially resulting in transient nitrite accumulation and indicating glycerol's superiority over  
30 other organic carbon sources in denitratation systems. pH and ORP inflection points in nitrogen  
31 transformation assays corresponded to maximum nitrite accumulation, indicating operational  
32 setpoints to prevent further nitrite reduction. Denitratation conditions supported enrichment of  
33 *Thauera* sp. as the dominant genus. Stoichiometric limitation of influent organic carbon,  
34 coupled with differential nitrate and nitrite reduction kinetics, optimized operational controls,  
35 and a distinctively enriched microbial ecology, was identified as causal in glycerol-driven  
36 denitratation.

37

38 KEYWORDS: partial denitrification; denitratation; glycerol; short-cut biological nitrogen  
39 removal; first-principles approach

40

## 41 1. Introduction

42 Conventional biological nitrogen removal (BNR), including energy and chemical-  
43 intensive nitrification and denitrification, is traditionally used to treat ammonium-laden ( $\text{NH}_4^+$ )  
44 waste streams. The advent of engineered processes that achieve oxidation of  $\text{NH}_4^+$  to nitrite  
45 ( $\text{NO}_2^-$ ), termed nitrification, combined with denitratation (reduction of  $\text{NO}_2^-$  to nitrogen gas ( $\text{N}_2$ ))

46 or anaerobic ammonium oxidation (anammox) represent short-cut BNR alternatives to  
47 conventional BNR approaches. Such short-cut BNR processes can provide reductions in  
48 chemical (external carbon for denitrification and alkalinity for nitrification) and energy use  
49 (aeration for nitrification), driving the desire for  $\text{NO}_2^-$  accumulation within these processes.

50 Alternatively, waste streams containing concomitantly high concentrations of  $\text{NH}_4^+$  and  
51 nitrate ( $\text{NO}_3^-$ ), such as those resulting from fertilizer<sup>1</sup> and explosives manufacturing,<sup>2,3</sup> provide  
52 similar energy and chemical reduction opportunities through distinct short-cut BNR processes.  
53 A particularly effective pathway for treating waste streams containing both  $\text{NH}_4^+$  and  $\text{NO}_3^-$  is  
54 through heterotrophic<sup>4-9</sup> or autotrophic<sup>10</sup> denitratation (selective reduction of  $\text{NO}_3^-$  to  $\text{NO}_2^-$ )  
55 coupled with downstream anammox. A combined denitratation-anammox system used to treat  
56 waste streams containing equal concentrations of  $\text{NH}_4^+$  and  $\text{NO}_3^-$  would theoretically reduce  
57 aeration energy requirements by 100% and COD requirements by 80% compared to treatment of  
58 the same waste stream using conventional BNR. Recent studies<sup>4-9</sup> on heterotrophic denitratation  
59 have focused on performance in lab-scale sequencing batch reactors (SBRs) driven by acetate,  
60 methanol, glucose, and sludge fermentation liquid due to the lack of sufficient readily  
61 biodegradable chemical oxygen demand (COD) in typical waste streams. These studies have  
62 primarily been observational in nature, with particular emphasis placed on empirically  
63 identifying parameters and conditions that potentially contributed to  $\text{NO}_2^-$  accumulation, such as  
64 influent COD:N ratios, pH, ORP, and loading rates. Stoichiometric limitation of influent  
65 COD:N ratios, specifically, has been shown to influence endpoint nitrogen speciation.<sup>11</sup> Various  
66 parameter combinations were optimized, denoted by the observation of stable  $\text{NO}_3^-$ -to- $\text{NO}_2^-$   
67 conversion ratios as high as 90% during steady-state studies.<sup>6</sup>

68           The selection of an external COD source to drive denitrification is critical when  
69 attempting to maximize  $\text{NO}_2^-$  accumulation. Traditionally, methanol has been one of the most  
70 widely used external COD sources for denitrification due to its low cost and wide availability.<sup>12</sup>  
71  $\text{NO}_2^-$  accumulation has proven difficult with methanol due to methanol dehydrogenase's direct  
72 delivery of electrons to cytochrome *c* and proximal to  $\text{NO}_2^-$  reductase as opposed to distribution  
73 solely through the ubiquinol pool to  $\text{NO}_3^-$  reductase similar to other carbon sources.<sup>13-15</sup> The  
74 unique electron delivery locations during methanol oxidation within the respiratory  
75 denitrification chain potentially contribute to concomitant  $\text{NO}_3^-$  and  $\text{NO}_2^-$  reduction.

76           Several water resource recovery facilities are switching to glycerol due to the operational  
77 and safety risks associated with methanol.<sup>12</sup> Glycerol is similar in cost to methanol and less  
78 expensive than ethanol and acetate,<sup>16-18</sup> is available as a waste or byproduct,<sup>19,20</sup> and has no  
79 known inhibitory effects on the anammox process, unlike methanol.<sup>21</sup>  $\text{NO}_2^-$  accumulation during  
80 glycerol supplementation was also anecdotally observed in full-scale treatment plants resulting in  
81 unintentional enrichment of anammox on the produced  $\text{NO}_2^-$ .<sup>22</sup> Nevertheless, to fully realize the  
82 operating benefits that a denitratation-anammox system could offer, it is imperative for the  
83 parameters and conditions leading to  $\text{NO}_2^-$  accumulation in a glycerol-driven denitratation  
84 system to be systematically identified, defined, and addressed in relation to reactor operating  
85 strategies.

86           Accordingly, the overarching goals of this study were to use a fundamentally-based, first  
87 principles approach to characterize the process kinetics, nitrogen conversion efficiencies, and  
88 microbial ecology of a glycerol-fed denitratation process, and identify concomitant reactor  
89 operating strategies. The specific objectives were to (1) control selective conversion of  $\text{NO}_3^-$  to  
90  $\text{NO}_2^-$  through stoichiometric limitation of influent glycerol dose, (2) quantify the rates of  $\text{NO}_3^-$

91 reduction relative to rates of  $\text{NO}_2^-$  reduction and understand their impact on the selective  
92 accumulation of  $\text{NO}_2^-$ , (3) elucidate the microbial community structure under varied carbon-  
93 loading levels in a functional glycerol-driven denitrification process, and (4) identify operational  
94 controls and reactor operating strategies to maximize denitrification rates and efficiencies.

95

## 96 2. Materials and Methods

### 97 2.1. Experimental Set-up and Reactor Operation

98 A lab-scale SBR with a working volume,  $V=12$  L, was operated at room temperature  
99 ( $22\pm 2^\circ\text{C}$ ) for a period of 232 d. The SBR was operated at a hydraulic retention time (HRT) of 1  
100 d, utilizing 4 cycles per day with each cycle consisting of a 90-min anoxic feed and react period,  
101 a 180-min anoxic react period, a 50-min settling period, and a 40-min decant period. SBR feed  
102 contained 100.0 mg/L  $\text{NO}_3^-$ -N as the terminal electron acceptor to simulate the influent of a high  
103  $\text{NO}_3^-$ -containing waste stream typical of a fertilizer<sup>1</sup> or explosives<sup>2</sup> manufacturing facility, 25.0  
104 mg/L  $\text{NH}_4^+$ -N (to support assimilation), and macro and trace nutrients (Table S1). pH was  
105 controlled automatically at  $7.50\pm 0.05$  using 0.5 M HCl and 1.0 M  $\text{NaHCO}_3$  via a chemical  
106 dosing pump (Etatron D.S., Italy). Sludge wasting was controlled daily at the end of the anoxic  
107 feed and react period following COD exhaustion to maintain a solids retention time (SRT) of 3  
108 d. Glycerol, diluted to a 15% solution by volume, served as the external COD source and was  
109 provided to meet influent COD: $\text{NO}_3^-$ -N ratios from 2.4:1 to 5.0:1. Glycerol was fed at the end of  
110 the anoxic feed and react period so that examined influent COD: $\text{NO}_3^-$ -N ratios were met during  
111 each cycle. Upon transitioning to each influent COD: $\text{NO}_3^-$ -N ratio tested, a stabilization period  
112 of 4 x SRT was allowed prior to assessing performance relative to other conditions. Sequencing

113 and timing of SBR cycles and daily solids wasting was controlled and maintained by peristaltic  
114 pumps (Masterflex, IL) using electronic timers (ChronTrol Corporation, CA).

115

## 116 2.2. Sample Collection and Wastewater Quality Analysis

117 All analytical procedures employed were in accordance with Standard Methods.<sup>23</sup>

118 Aqueous-phase samples were withdrawn during the decant period of the reactor cycle and  
119 concurrently from the influent for chemical species analysis after centrifugation (8,000 x G, 10

120 min, 4-8°C) to remove cells and cell debris. NO<sub>3</sub><sup>-</sup> and NH<sub>4</sub><sup>+</sup> were measured using ion selective

121 electrodes (Thermo Fisher Scientific, MA). NO<sub>2</sub><sup>-</sup> concentration was measured via diazotization

122 and colorimetry.<sup>23</sup> The fraction of influent NO<sub>3</sub><sup>-</sup> lost to nitrogenous gases was determined via

123 mass balance on nitrogen. Centrifuged aqueous-phase samples were filtered using 0.20 µm

124 syringe filters (A Chemtek, MA) and stored at -20°C. Dionex ICS-2100 ion chromatography

125 using a Dionex IonPac AS-18 IC column (Thermo Fisher Scientific, MA) was used to confirm

126 ion selective electrode and colorimetric measurements of NO<sub>3</sub><sup>-</sup> and NO<sub>2</sub><sup>-</sup> concentrations,

127 respectively. Similarly, a Dionex IonPac AS-14 IC column (Thermo Fisher Scientific, MA) was

128 used to quantify volatile fatty acid production during unbuffered *ex situ* batch kinetic assays.

129 Separate aqueous-phase samples were extracted at the end of the anoxic react period and during

130 the decant period of the reactor cycle to assess total biomass concentrations in the reactor and

131 effluent, respectively, for SRT control. Aqueous-phase samples taken during the decant period

132 were centrifuged (8,000 x G, 10 min, 4-8°C) and filtered using 0.45 µm syringe filters (A

133 Chemtek, MA) to assess remaining soluble COD (sCOD) concentrations (Hach Chemical

134 Company, CO). Biomass concentrations were approximated by subtracting sCOD measurements

135 from total COD measurements to determine particulate COD (pCOD) (Hach Chemical

136 Company, CO).<sup>24</sup> Additional aqueous-phase samples taken just prior to the end of the anoxic  
137 react period were centrifuged (8,000 x G, 10 min, 4-8°C), supernatant was discarded, and cell  
138 pellets were preserved at -80°C for subsequent DNA extraction and 16S rRNA gene sequencing.

139

### 140 2.3. Feeding Strategy Experiments

141 Two feeding strategies were tested to maximize NO<sub>2</sub><sup>-</sup> accumulation. A semi-continuous  
142 feeding strategy delivered NO<sub>3</sub><sup>-</sup>-containing SBR feed and glycerol continuously for the first 75  
143 and 72 min, respectively, of the anoxic feed and react period (Fig. S1). A pulse feeding strategy  
144 delivered a pulse of NO<sub>3</sub><sup>-</sup>-containing SBR feed and glycerol every 45 min for the first 270 min of  
145 the SBR cycle (Fig. S1). Feeding rates were controlled to maintain equivalent mass loading rates  
146 of NO<sub>3</sub><sup>-</sup> and glycerol and influent COD:NO<sub>3</sub><sup>-</sup>-N ratios for the two feeding strategies.

147

### 148 2.4. Batch kinetic assays

149 Batch assays, *in situ* (within the SBR) and *ex situ*, were conducted to measure extant  
150 process kinetics and optimize operational controls, including batch duration, pH, and ORP. *In*  
151 *situ* assays followed previously described sampling collection and chemical analysis procedures.  
152 Aqueous-phase samples were obtained from the primary SBR at steady-state over the course of a  
153 single 360-min reactor cycle. *Ex situ* assays were carried out in an anoxic, sealed, spinner flask  
154 batch vessel with a working volume, V=1 L, at room temperature (22±2°C). Mixed liquor was  
155 taken from the primary SBR at steady-state during the feed and react period, washed 4 times  
156 using SBR feed without NO<sub>3</sub><sup>-</sup>, and supernatant was discarded. Prior to extant kinetic batch  
157 assays, the medium was buffered to pH 7.50 using 0.5 M HCl and 1.0 M NaHCO<sub>3</sub> and N<sub>2</sub> gas  
158 was sparged until dissolved oxygen (DO) levels were equal to 0.01 mg/L O<sub>2</sub>, or the minimum

159 practical limit of the InPro 6850i polarographic DO sensor with M300 transmitter (Mettler-  
160 Toledo, OH). pH was maintained at pH 7.50±0.05 by manual control. pH optimization batch  
161 assays were conducted within normal pH operating ranges (see Supporting Information (SI)).  
162 NO<sub>3</sub><sup>-</sup> and glycerol were dosed to meet the desired initial COD:NO<sub>3</sub><sup>-</sup>-N ratio. NO<sub>3</sub><sup>-</sup> was dosed at  
163 the outset of the experiment (time=0 min) and the biomass was incubated for 30 min prior to the  
164 addition of glycerol to ensure that residual nitrogen species and glycerol from the primary SBR  
165 remaining in the washed mixed liquor were consumed prior to data collection. pH, ORP, and  
166 DO were measured and recorded continuously via an InPro 3253i/SG pH/ORP electrode and an  
167 InPro 6850i polarographic DO sensor, respectively, attached to an M300 transmitter (Mettler-  
168 Toledo, OH). Following extant kinetic batch assays, linear regression with R<sup>2</sup>≥95% of NO<sub>x</sub>-N  
169 species from time points of maximum concentration to minimum concentration for each  
170 respective species was performed with pCOD concentrations taken just prior to glycerol input to  
171 determine true specific rates of NO<sub>3</sub><sup>-</sup> reduction (sDNaR) (Eqn. 1) and NO<sub>2</sub><sup>-</sup> reduction (sDNiR)  
172 (Eqn. 2). NO<sub>2</sub><sup>-</sup> production resulting from NO<sub>3</sub><sup>-</sup> reduction was not accounted for in the  
173 determination of specific rates of NO<sub>2</sub><sup>-</sup> reduction, yet this remains representative of a true  
174 reduction rate. During the time points assessed for each influent COD:NO<sub>3</sub><sup>-</sup>-N ratio, NO<sub>3</sub><sup>-</sup>  
175 removal was complete or near-complete (<3% of initial dose) except at influent COD:NO<sub>3</sub><sup>-</sup>-  
176 N=2.5:1 where NO<sub>3</sub><sup>-</sup> concentration measurements confirmed no continued NO<sub>3</sub><sup>-</sup> reduction.  
177 pCOD measurements were used to determine maximum specific substrate consumption rates  
178 (Eqns. 1-2).

179

$$180 \quad sDNaR = \left(\frac{1}{X}\right) \left(\frac{\Delta S_{NO_3^-}}{\Delta t}\right) \quad \text{Eqn. 1}$$

181



182  $sDNiR = \left(\frac{1}{X}\right) \left(\frac{\Delta S_{NO_2^-}}{\Delta t}\right)$  Eqn. 2

183

184 Where:

185  $sDNaR$ : maximum specific  $NO_3^-$  consumption rate (mg  $NO_3^-$ -N/g VSS/h)

186  $sDNiR$ : maximum specific  $NO_2^-$  consumption rate (mg  $NO_2^-$ -N/g VSS/h)

187  $X$ : volumetric biomass concentration approximated using pCOD measurements (g

188 VSS/L)

189  $\frac{\Delta S_{NO_3^-}}{\Delta t}$ : volumetric substrate ( $NO_3^-$ ) consumption rate (mg  $NO_3^-$ -N/L/h)

190  $\frac{\Delta S_{NO_2^-}}{\Delta t}$ : volumetric substrate ( $NO_2^-$ ) consumption rate (mg  $NO_3^-$ -N/L/h)

191

## 192 2.5. DNA Extraction, Next-Generation Sequencing of Amplicon Library, and Bioinformatics

193 DNA was extracted from biomass samples and purified using a QIAamp DNA Mini Kit

194 (Qiagen, Inc., MD). The quality and quantity of DNA were checked using a NanoDrop Lite

195 spectrophotometer (Thermo Fisher Scientific, MA). Barcoded fusion primers with Ion Xpress™

196 sequencing adapters (Thermo Fisher Scientific, MA) and a 16S rRNA bacterial 1055F/1392R

197 universal primer set were applied in each sample for multiplex sequencing. Amplification of

198 genomic DNA targets was performed with iQ™ SYBR® Green Supermix (Bio-Rad, CA) and

199 purification via Agencourt AMPure XP Reagent (Beckman Coulter, CA). Library quantification

200 was performed with an Agilent DNA 1000 Kit (Agilent, CA). Template preparation with the

201 DNA library followed by Ion Spheres Particle (ISP) enrichment was performed using Ion

202 OneTouch2 (Ion PGM Hi-Q View OT2 Kit). Enriched ISP was loaded onto an Ion Torrent 318

203 v2 BC chip and run on an Ion Torrent Personal Genome Machine (Ion PGM Hi-Q View

204 Sequencing Kit). Ion Torrent Suite software was used for base calling, signal processing, and

205 quality filtering (Phred score of >15) of the raw sequences. The 1055F/1392R universal primer  
206 set targeted sequences of approximately 350 base pairs (bp). Mothur software was used to  
207 initially screen out likely incorrect amplicon sequences with bp lengths more than 50 bp different  
208 than the target sequence length.<sup>25</sup> AfterQC software was utilized to further delete bad quality  
209 reads (Phred score of <20) and trim the tails of reads where quality dropped significantly.<sup>26</sup>  
210 DADA2 programming via R Studio software was used to produce a table of non-chimeric  
211 amplicon sequence variants from the demultiplexed fastq files.<sup>27</sup> QIIME2 software was applied  
212 in conjunction with the Silva version 132 reference taxonomy for further post-sequencing  
213 bioinformatic analysis.<sup>28</sup>

214

## 215 2.6. Nitrogen Conversion Calculations

216 Reactor performance was normalized with respect to the influent characteristics. A NO<sub>2</sub><sup>-</sup>  
217 accumulation ratio (NAR) (Eqn. 3) was defined to relate the accumulation of NO<sub>2</sub><sup>-</sup> to the  
218 removal of NO<sub>3</sub><sup>-</sup>.<sup>29</sup> A NAR equal to 100% indicated that all NO<sub>3</sub><sup>-</sup> removed accumulated as NO<sub>2</sub><sup>-</sup>  
219 compared to terminal reduction to N<sub>2</sub> gas, for which the NAR would be 0%.

220

$$221 \text{ NAR} = \left[ \frac{(\text{NO}_{2,\text{eff}}^- - \text{NO}_{2,\text{inf}}^-)}{(\text{NO}_{3,\text{inf}}^-) - (\text{NO}_{3,\text{eff}}^-)} \right] \times 100\% \quad \text{Eqn. 3}$$

222

223 NO<sub>3</sub><sup>-</sup> reduction was also classified in terms of a NO<sub>3</sub><sup>-</sup> reduction ratio (NRR) (Eqn. 4),  
224 which normalized the conversion of NO<sub>3</sub><sup>-</sup> to the influent NO<sub>3</sub><sup>-</sup> concentration.<sup>9</sup> A NRR equal to  
225 100% would indicate conversion of all influent NO<sub>3</sub><sup>-</sup> to any reduced form, while a NRR of 0%  
226 would indicate no conversion.

227

$$NRR = \left[ \frac{(NO_3^-, \text{inf-N}) - (NO_3^-, \text{eff-N})}{(NO_3^-, \text{inf-N})} \right] \times 100\% \quad \text{Eqn. 4}$$

229

### 230 3. Results and Discussion

#### 231 3.1. Denitrification Reactor Performance

232 The influent COD:NO<sub>3</sub><sup>-</sup>-N ratio required for glycerol-driven denitrification (NO<sub>3</sub><sup>-</sup>-N to N<sub>2</sub>  
233 reduction) was thermodynamically<sup>30</sup> determined to be 5.9:1 (see SI). This corresponded well  
234 with experimentally-determined operational ratios of 4.2:1 to 5.6:1,<sup>16,20,31</sup> although the lowest  
235 reported ratio<sup>16</sup> may not be fully representative as it was determined via *ex situ* batch assays as  
236 opposed to steady-state continuous flow bioreactor or SBR operation. Stoichiometric analysis  
237 revealed that influent COD:NO<sub>3</sub><sup>-</sup>-N=2.4:1 (see SI) would provide only enough electrons via  
238 COD oxidation to reduce NO<sub>3</sub><sup>-</sup> to NO<sub>2</sub><sup>-</sup> on a theoretical electron equivalence basis as opposed to  
239 full denitrification. Therefore, influent COD:NO<sub>3</sub><sup>-</sup>-N ratios between 2.4:1 and 5.9:1 were  
240 referred to as stoichiometrically-limited for the purposes of this study. These calculations form  
241 the fundamentally-based foundation to the first principles approach used in this study to conduct  
242 and interpret the results of glycerol-driven denitrification presented herein.

243 The utilization of glycerol as the external COD source and electron donor resulted in  
244 significant NO<sub>2</sub><sup>-</sup> accumulation at stoichiometrically-limited influent COD:NO<sub>3</sub><sup>-</sup>-N ratios from  
245 2.5:1 to 5.0:1, indicating that the use of glycerol was feasible to sustain a denitrification process.  
246 The highest degrees of NO<sub>3</sub><sup>-</sup> removal and NO<sub>2</sub><sup>-</sup> accumulation, as a function of influent  
247 COD:NO<sub>3</sub><sup>-</sup>-N ratio during steady-state SBR operation, occurred at influent COD:NO<sub>3</sub><sup>-</sup>-N=3.0:1  
248 (Fig. 1). This resulted in an average NO<sub>2</sub><sup>-</sup> accumulation of 60.8±11.5 mg/L NO<sub>2</sub><sup>-</sup>-N (n=10) and  
249 NAR of 62%, indicating that 62% of the NO<sub>3</sub><sup>-</sup> reduced was converted to NO<sub>2</sub><sup>-</sup> rather than  
250 terminally reduced to N<sub>2</sub> gas. Additionally, the NRR was determined to be 96%, indicating that

251 a majority of the influent  $\text{NO}_3^-$  was converted leaving only approximately 4% of influent  $\text{NO}_3^-$  in  
252 the effluent (Table 1). Accumulation of  $\text{NO}_2^-$  at influent COD: $\text{NO}_3^-$ -N=2.8:1 compared to  
253 influent COD: $\text{NO}_3^-$ -N=3.0:1 was not significantly different ( $p=0.49$ ,  $\alpha=0.05$ ,  $n=10$ ). Substantial  
254  $\text{NO}_3^-$  accumulation occurred at influent COD: $\text{NO}_3^-$ -N=2.8:1 ( $31.7 \pm 11.4$  mg/L  $\text{NO}_3^-$ -N,  $n=11$ ),  
255 signifying that this ratio was less operationally optimal compared to influent COD: $\text{NO}_3^-$ -  
256 N=3.0:1. The observed  $\text{NO}_3^-$  accumulation at influent COD: $\text{NO}_3^-$ -N=2.5:1 and 2.8:1 may be due  
257 to lower COD-supported biomass concentrations leading to reduced denitrification rates.  
258 However, effluent sCOD concentrations were negligible signifying that glycerol was nearly  
259 completely consumed (sCOD and biomass concentration data not shown). *In situ* performance  
260 profiles (Fig. 2) did not show significant endogenous denitrification, potentially indicating that  
261 COD uptake and storage was minimal. Rather, the observed  $\text{NO}_3^-$  accumulation in these cases  
262 indicated that the influent COD: $\text{NO}_3^-$ -N was not sufficient,<sup>9</sup> potentially due to unrealized COD  
263 requirements for cell maintenance and synthesis<sup>32</sup> or additional demand by fully denitrifying  
264 microorganisms remaining in the microbial community. Therefore, influent COD: $\text{NO}_3^-$ -N=3.0:1  
265 was selected as the optimal ratio due to the similar  $\text{NO}_2^-$  accumulation to influent COD: $\text{NO}_3^-$ -  
266 N=2.8:1 coupled to less than 4% of the influent  $\text{NO}_3^-$  remaining in the effluent. The high  
267 sensitivity at influent COD: $\text{NO}_3^-$ -N<3.0:1 highlighted significant implication for accurate system  
268 operation and control. A minimal reduction in influent COD: $\text{NO}_3^-$ -N ratio from 3.0:1 to 2.8:1  
269 yielded a sevenfold increase in effluent  $\text{NO}_3^-$ , signifying that strict control of the glycerol-driven  
270 denitrification system must be maintained. To this end, online dosing control<sup>17</sup> based on  
271 appropriate signals of reactor performance seems necessary to maximize concomitant  $\text{NO}_3^-$ -N  
272 conversion selectively to  $\text{NO}_2^-$  during partial denitrification.

273 Analysis of variance (ANOVA) across the influent COD:NO<sub>3</sub><sup>-</sup>-N ratios identified a  
274 statistically significant difference in NAR ( $p=4.8 \times 10^{-11}$ ,  $\alpha=0.05$ ,  $n=38$ ) with a decrease from 62%  
275 to 11% as the influent COD:NO<sub>3</sub><sup>-</sup>-N ratio approached that for glycerol-driven denitrification  
276 (5.9:1; see SI). Further Holm-Sidak post-hoc multiple comparison analysis indicated that the  
277 significant difference in NAR was primarily caused by the expectedly lower NAR at influent  
278 COD:NO<sub>3</sub><sup>-</sup>-N=5.0:1 ( $p<9.7 \times 10^{-5}$  for all comparisons,  $\alpha=0.05$ ; Table S2). The decrease in NAR  
279 from influent COD:NO<sub>3</sub><sup>-</sup>-N=4.0:1 to 5.0:1 was most likely attributable to excess available COD.

280 Previous studies<sup>4,6</sup> observed that varying the influent COD:NO<sub>3</sub><sup>-</sup>-N ratio had a negligible  
281 effect on the NAR determined at the point of maximum NO<sub>2</sub><sup>-</sup> accumulation during *ex situ* batch  
282 experiments, while a separate batch study<sup>33</sup> concluded that the COD source, as opposed to the  
283 influent COD:NO<sub>3</sub><sup>-</sup>-N ratio, impacted the NAR more readily. In contrast, another separate batch  
284 study<sup>7</sup> concluded that NO<sub>2</sub><sup>-</sup> accumulation was influenced by both the COD source and COD  
285 dosing. While insightful, the utility of these results<sup>4,6,7</sup> to guide steady-state denitrification  
286 processes is limited as these studies failed to acclimate their batch experiment seed sludge to the  
287 conditions being investigated, which likely contributed to their discrepancy with the current  
288 study. Despite investigating the impact of various influent COD:NO<sub>3</sub><sup>-</sup>-N ratios, Ge et al.<sup>7</sup>  
289 utilized a fully denitrifying inoculum, whereas Du et al.<sup>6</sup> inoculated batch experiments assessing  
290 various influent COD:NO<sub>3</sub><sup>-</sup>-N ratios with a microbial community acclimated to a single  
291 stoichiometrically-limited influent COD:NO<sub>3</sub><sup>-</sup>-N ratio. Both seed sludges likely contained  
292 phenotypes with NO<sub>2</sub><sup>-</sup> accumulation capabilities different than those expected following  
293 acclimation to the investigated conditions. Cao et al.<sup>4</sup> did not report conditions of their batch  
294 inoculum.

295 In an improvement over these previous efforts, our current study utilized a sludge  
296 stabilization and acclimation period of 4 x SRT following influent COD:NO<sub>3</sub><sup>-</sup>-N ratio changes.  
297 This intentionally allowed the microbial community to adapt to the influent COD:NO<sub>3</sub><sup>-</sup>-N ratio  
298 being investigated. In doing so, it was observed that the influent COD:NO<sub>3</sub><sup>-</sup>-N ratio had similar  
299 impacts on NAR during both steady-state operation (Fig. 1) and *ex situ* batch assays, with NO<sub>2</sub><sup>-</sup>  
300 accumulation decreasing as influent COD:NO<sub>3</sub><sup>-</sup>-N ratios increased (Fig. S2).

301 In comparison to other steady-state operation studies<sup>6,9,34</sup> using primarily sodium acetate  
302 as the external COD source, glycerol-driven NARs were at least 10% lower (Table 1). While  
303 most reported acetate-driven denitratation NARs were greater than 80%, glycerol-driven  
304 denitratation yielded NARs less than 70%. These respective acetate-driven steady-state  
305 studies<sup>6,9,34</sup> were deemed reasonable comparisons due to similar COD dosing regimens and  
306 results were reported for study periods sufficient in length to assume microbial community  
307 acclimation to and stabilization at the studied conditions. Despite this, the assessment of reactor  
308 performance based solely upon reported NARs can be misleading as the index does not account  
309 for complete or other conversion of influent NO<sub>3</sub><sup>-</sup>. Thus, NAR=100% does not necessarily  
310 indicate that all influent NO<sub>3</sub><sup>-</sup> was converted. Several studies,<sup>4-6,34</sup> however, reported NRRs of  
311 nearly 100% that when coupled with a NAR approaching 100% indicated near-perfect  
312 denitratation performance (Table 1). It follows then that optimal performance in the current  
313 study occurred at influent COD:NO<sub>3</sub><sup>-</sup>-N=3.0:1 with NAR=62% and NRR=96%. The inability of  
314 glycerol to achieve similar efficiency to acetate- or fermentate-driven denitratation is not  
315 currently understood. Possible explanations include a greater intracellular carbon and microbial  
316 energy storage mechanism during low substrate availability,<sup>35,36</sup> the COD-source supported  
317 enrichment of a microbial consortium with a greater abundance of true denitrifiers,<sup>37</sup> an

318 inefficient metabolism in support of denitratation due to a less direct assimilability of glycerol, or  
319 the downstream delivery of electrons on the electron transport chain similar to methanol.<sup>14,15</sup>

320 Effluent sCOD measurements, as an estimation of residual glycerol concentration,  
321 averaged  $9.4 \pm 8.8$  mg/L COD (n=29) across all influent COD:NO<sub>3</sub><sup>-</sup>-N ratios assessed. The *ca.*  
322 96% average decrease from influent to effluent sCOD indicates that nearly all of the glycerol  
323 was consumed, and that reactor cycle duration was adequate for COD consumption.

324 A likely contributing factor to the need for a higher than the theoretical influent  
325 COD:NO<sub>3</sub><sup>-</sup>-N ratio (see SI) was an incomplete enrichment for a solely denitrating or  
326 progressive onset<sup>38</sup> phenotype-dominated microbial community. The presence of  
327 microorganisms that express a complete denitrification metabolic pathway or those that exhibit a  
328 rapid, complete onset of denitrification genes<sup>38</sup> would impose a competitive demand on influent  
329 COD, thus decreasing its availability for selective reduction of NO<sub>3</sub><sup>-</sup> to NO<sub>2</sub><sup>-</sup>. This additional  
330 COD demand would result in a high NRR but low NAR, or significant gaseous-N products with  
331 limited NO<sub>2</sub><sup>-</sup> accumulation, which was supported by the results herein (Table 1).

332

### 333 3.2. Process Kinetics

334 Notably, extant kinetic analysis indicated that transient NO<sub>2</sub><sup>-</sup> accumulation at all influent  
335 COD:NO<sub>3</sub><sup>-</sup>-N ratios assessed was potentially due to at least one order of magnitude greater  
336 specific rates of NO<sub>3</sub><sup>-</sup> reduction compared to the specific rates of NO<sub>2</sub><sup>-</sup> reduction driven by  
337 glycerol (Table 2).<sup>39</sup> Observed performance at influent COD:NO<sub>3</sub><sup>-</sup>-N>3.0:1 (Fig. S2) also  
338 supported this assertion as the maximum NO<sub>2</sub><sup>-</sup> accumulated never equaled the initial NO<sub>3</sub><sup>-</sup>  
339 concentration, indicating that there was concomitant reduction of NO<sub>3</sub><sup>-</sup> and NO<sub>2</sub><sup>-</sup>. However,  
340 performance at influent COD:NO<sub>3</sub><sup>-</sup>-N=3.0:1 resulted in near-complete selective reduction of

341  $\text{NO}_3^-$  to  $\text{NO}_2^-$  prior to terminal reduction to  $\text{N}_2$  gas (Fig. S2). It should be emphasized that the  
342 kinetic profiles in Fig. S2 were obtained from acclimated biomass from individual SBRs  
343 operated for at least 4 x SRT at each influent COD: $\text{NO}_3^-$ -N ratio.

344 In general, measured specific rates of  $\text{NO}_3^-$  reduction and  $\mu_{\text{max}}$  values were higher than  
345 those previously reported for glycerol-driven full denitrification studies (Table 2) and may be  
346 due to differences in the microbial community that was selected for by stoichiometric limitation  
347 during our current denitrification-specific study. Glycerol-driven specific rates of  $\text{NO}_3^-$  reduction  
348 values were nearly double those reported for acetate-driven systems at similar influent  
349 COD: $\text{NO}_3^-$ -N ratios, but slightly lower than those observed in an experiment utilizing a  
350 combination of external COD sources garnered from sodium acetate and endogenous carbon in a  
351 domestic wastewater stream (Table 2). The ratios of sDNaR:sDNiR achieved in this study with  
352 glycerol across different influent COD: $\text{NO}_3^-$ -N values were also higher than previously reported  
353 with acetate (Table 2). This difference may be due to variations in the direct assimilability of  
354 each COD source with more assimilable COD sources such as glycerol or endogenous carbon in  
355 these cases supporting greater specific rates of  $\text{NO}_3^-$  reduction,<sup>32</sup> or the COD source-supported  
356 microbial community.

357

### 358 3.3. $\text{NO}_2^-$ Accumulation through the Management of Operational Controls

#### 359 3.3.1. Denitrification Control via Batch Duration

360 Batch duration was identified as an effective process control parameter to maximize  $\text{NO}_2^-$   
361 accumulation. The duration of the anoxic feed and react period could be shortened to achieve  
362 comparable or improved performance.  $\text{NO}_2^-$  concentrations decreased following peaks of  $\text{NO}_2^-$   
363 accumulation at higher influent COD: $\text{NO}_3^-$ -N ratios (4.0:1, 5.0:1; Fig. 2). This decrease was not



364 observed at influent COD:NO<sub>3</sub><sup>-</sup>-N=3.0:1, indicating that excess COD remained following  
365 completion of denitrification at higher ratios. Despite minimal NO<sub>2</sub><sup>-</sup> reduction following peak  
366 NO<sub>2</sub><sup>-</sup> accumulation at influent COD:NO<sub>3</sub><sup>-</sup>-N=2.5:1, overall performance remained low, making  
367 this ratio less effective at achieving partial denitrification (Table 1; Fig. 2).

368 Results generally supported that influent COD:NO<sub>3</sub><sup>-</sup>-N ratios have an inverse relationship  
369 with time to maximum NO<sub>2</sub><sup>-</sup> accumulation during the anoxic react period. Batch duration could  
370 be reduced to 150 minutes or less, or the time to maximum NO<sub>2</sub><sup>-</sup> accumulation (Fig. 2).  
371 Subtraction of the feed and react period of the SBR cycle from the reduced batch duration, by  
372 extension, would yield an optimal react time equivalent to a continuous flow system's HRT (Fig.  
373 2). The optimal react time is representative of when glycerol is available for NO<sub>3</sub><sup>-</sup> reduction in  
374 both systems. Therefore, the identified optimal react times in our SBR system would be  
375 equivalent to HRTs of approximately 30 minutes (COD:NO<sub>3</sub><sup>-</sup>-N=4.0:1 and 5.0:1) to 60 minutes  
376 (COD:NO<sub>3</sub><sup>-</sup>-N=2.5:1 and 3.0:1) in continuous flow systems operating at each respective influent  
377 COD:NO<sub>3</sub><sup>-</sup>-N ratio.

378

### 379 3.3.2. Denitrification Control via pH and ORP

380 During unbuffered and non-carbon limited operation (influent COD:NO<sub>3</sub><sup>-</sup>-N≥5.9:1), the  
381 denitrification-dominated phase of the denitrification profile exhibited a distinct decrease in the  
382 reactor's pH and increase in the ORP until both reached inflection points after which pH increased  
383 and ORP decreased (Fig. 3). At this inflection point, NO<sub>3</sub><sup>-</sup> reduction decelerated due to the  
384 depletion of available NO<sub>3</sub><sup>-</sup> allowing for observable concomitant NO<sub>2</sub><sup>-</sup> reduction thus decreasing  
385 the NAR and negatively impacting the objective of maximizing NO<sub>2</sub><sup>-</sup> accumulation. Continuous  
386 monitoring of pH and ORP could provide an observable real-time control to maximize

387 denitratation. While feedforward online control of COD dosing tied to influent NO<sub>x</sub> loading has  
388 proven effective in controlling denitratation,<sup>17</sup> this system requires online NO<sub>x</sub> sensors which  
389 may not be achievable at all plants due to potentially high capital<sup>40</sup> and maintenance costs.<sup>41</sup>  
390 Rather, denitratation control via pH and ORP observation could provide a backup check or serve  
391 as a less costly alternative<sup>40</sup> with widely available and utilized sensors.

392 pH and ORP were previously reported as control parameters for denitrification driven by  
393 acetate, methanol, endogenous carbon, soybean wastewater, and brewery wastewater.<sup>6,7,33,42,43</sup>  
394 Contrary to the distinct glycerol-driven pH and ORP profile observed in the current study, Ge et  
395 al.<sup>7</sup> and Du et al.<sup>6</sup> described acetate-driven profiles exhibiting a general increase in pH whereby a  
396 “turning point” separated denitratation from denitritation. However, the observed pH profiles  
397 obtained experimentally in our study (Fig. 3) are in excellent concurrence with theoretically  
398 calculated net production of 0.43 equivalents of acidity per mole NO<sub>3</sub><sup>-</sup> reduced to NO<sub>2</sub><sup>-</sup> (Eqn. 5),  
399 which supported the observed pH fluctuation profiles.

400

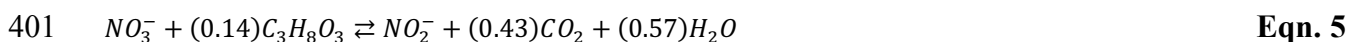

402

403 For completeness, stoichiometry (Eqn. 6) reveals that denitritation should result in a net  
404 consumption of 0.36 equivalents of acidity per mole NO<sub>2</sub><sup>-</sup> reduced to N<sub>2</sub> gas at pH 7.5.

405

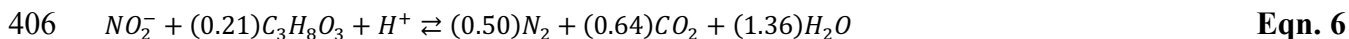

407

### 408 3.3.3. Denitrification Control via Feeding Strategy

409       The pulse feeding strategy resulted in a statistically significant improvement in  
410 denitrification performance ( $\alpha=0.05$ ;  $n=8$ ) over the semi-continuous feeding strategy in both  $\text{NO}_2^-$   
411 accumulation ( $p=0.03$ ) and  $\text{NO}_3^-$  reduction ( $p=0.0003$ ), indicating that feeding methodology  
412 impacted the performance of the system (Table S3). As both feeding strategies maintained  
413 equivalent influent COD: $\text{NO}_3^-$ -N ratio per substrate pulse or for the duration of the semi-  
414 continuous feeding period, this difference in system performance was thought to be influenced  
415 by the temporal distribution of substrate pulses. Those pulses occurring later in the anoxic feed  
416 and react period may have limited the time for the biotransformation of  $\text{NO}_3^-$  to gaseous nitrogen  
417 thus allowing for greater  $\text{NO}_2^-$  accumulation. This is counter to the semi-continuous feeding  
418 strategy, where fully denitrifying microorganisms within the microbial community had the full  
419 anoxic feed and react period to reduce influent  $\text{NO}_3^-$ . Therefore, in a continuous-flow BNR  
420 process, the spatial location of introducing glycerol could be another factor to promote partial  
421 denitrification if possible. Optimizing the dosing location of electron donors is quite widely  
422 practiced for increasing the efficiency of COD utilization even for full denitrification in step-feed  
423 BNR or Bardenpho configurations.<sup>44</sup>

424

### 425 3.4. Microbial Ecology

426       *Proteobacteria* was the most dominant phylum out of 14 identified at all influent  
427 COD: $\text{NO}_3^-$ -N ratios (Fig. 4a).  $\beta$ -*Proteobacteria* made up at least 73% of the *Proteobacteria*  
428 phylum at all influent COD: $\text{NO}_3^-$ -N ratios. In a survey of wastewater denitrifying bacterial 16S  
429 rDNA sequences retrieved from GenBank, Lu et al.<sup>45</sup> found that approximately 72% of

430 prokaryotic microorganisms displaying denitrifying capabilities were taxonomically affiliated  
431 with *Proteobacteria*, while  $\beta$  sub-class affiliated microorganisms were typically abundant in  
432 denitrifying activated sludge,<sup>1,45,46</sup> similar to the findings herein.

433         Within  $\beta$ -*Proteobacteria*, the *Rhodocyclaceae* and *Comamonadaceae* families were  
434 identified as those mainly involved in denitrification in activated sludge.<sup>46,47</sup> Our findings  
435 supported this as *Thauera* sp., that belongs to the *Rhodocyclaceae* family within  $\beta$ -  
436 *Proteobacteria* was enriched as the most dominant genus with a relative abundance of nearly  
437 80% at influent COD:NO<sub>3</sub><sup>-</sup>-N=3.0:1 (Fig. 4b). *Comamonadaceae* fam. was not found, indicating  
438 that their enrichment may not be favored under stoichiometrically-limited conditions imposed  
439 herein. Certain *Thauera* spp. strains were characterized according to two distinct regulatory  
440 phenotypes,<sup>48</sup> including the immediate and simultaneous onset of all denitrification genes with  
441 no detectable NO<sub>2</sub><sup>-</sup> accumulation, as well as the progressive and sequential onset of  
442 denitrification cascade genes with appreciable NO<sub>2</sub><sup>-</sup> accumulation.<sup>38</sup> Selective pressures were  
443 not identified for either, although the selection for progressive onset denitrifiers would be critical  
444 to facilitate denitrification. The coupling of a high relative abundance of *Thauera* sp. (Fig. 4b),  
445 high NRR, and high NAR (Table 1), with the ability to perform full denitrification when  
446 presented with sufficient COD (Fig. S2) indicated that the application of stoichiometric  
447 limitation in the influent COD:NO<sub>3</sub><sup>-</sup>-N as a selective pressure may favor the progressive onset  
448 over rapid, complete onset phenotype. *Thauera* sp. may represent a key functional  
449 microorganism for denitrification systems indicated by its decreasing relative abundances away  
450 from the optimal influent COD:NO<sub>3</sub><sup>-</sup>-N (Fig. 4b). Several recent denitrification-specific  
451 studies<sup>4,6,9,49</sup> further supported this argument with reported *Thauera* sp. relative abundances from  
452 55% to 73% under limited influent COD:NO<sub>3</sub><sup>-</sup>-N ratios with acetate as the external COD source

453 despite different seed sludges. In comparison, acetate-driven full denitrification studies reported  
454 no more than 12% relative abundance of *Thauera* sp.<sup>46,50</sup> Therefore, the application of a  
455 stoichiometrically-limited influent COD:NO<sub>3</sub><sup>-</sup>-N ratio as a selective pressure in a denitrification  
456 system may impart a stronger impact on the denitrifying community structure than previously  
457 recognized.

458

#### 459 4. Conclusions

460 Denitrification, with downstream anammox processes, offers chemical and energy  
461 reductions through resource-efficient BNR of NH<sub>4</sub><sup>+</sup> and NO<sub>3</sub><sup>-</sup>-laden waste streams. A  
462 fundamentally-based, first-principles approach was used to propose an influent COD:N ratio and  
463 other operating parameters that would promote denitrification and experimental results aligned  
464 with expectations. Glycerol supported the process kinetics and microbial ecology necessary to  
465 selectively convert NO<sub>3</sub><sup>-</sup> to NO<sub>2</sub><sup>-</sup> in denitrification systems. Process control strategies, including  
466 influent COD loading and pH, ORP, and batch duration operational setpoints were identified and  
467 used to further define reactor operating strategies that could maximize denitrification performance.  
468 Significant enrichment indicated *Thauera* sp. may represent a key functional microorganism in  
469 denitrification systems. This study implicated stoichiometric limitation of influent organic carbon,  
470 unique microbial community enrichment, and differential NO<sub>3</sub><sup>-</sup> and NO<sub>2</sub><sup>-</sup> reduction kinetics as  
471 determinant factors in glycerol-driven denitrification.

472

#### 473 ADDITIONAL INFORMATION

474 E-supplementary data can be found in online version of the paper.

475

476 AUTHOR INFORMATION

477 **ORCID**

478 Matthew Baideme: 0000-0002-2556-0624

479 Kartik Chandran: 0000-0002-7526-3724

480 **Author Contributions:** The manuscript was written through contributions of all authors. All  
481 authors gave approval to the final version of the manuscript. All authors contributed equally.

482 **Notes:** The authors declare no competing financial interests.

483

484 ACKNOWLEDGMENTS

485 This study was supported by Project Director, Joint Services, project USMA1740. Views and  
486 opinions expressed or implied herein are solely those of the authors and should not be construed  
487 as policy or carrying the official sanction of the Department of Defense, United States Army,  
488 United States Military Academy, or other agencies or departments of the U.S. Government.

489

490 REFERENCES

491 1 C. S. Srinandan, M. Shah, B. Patel and A. S. Nerurkar, *Bioresour. Technol.*, 2011, **102**,  
492 9481–9489.

493 2 P. Cyplik, R. Marecik, A. Piotrowska-Cyplik, A. Olejnik, A. Drożdżyńska and Ł.  
494 Chrzanowski, *Water, Air, Soil Pollut.*, 2012, **223**, 1791–1800.

495 3 J. Shen, R. He, W. Han, X. Sun, J. Li and L. Wang, *J. Hazard. Mater.*, 2009, **172**, 595–600.

496 4 S. Cao, R. Du, B. Li, S. Wang, N. Ren and Y. Peng, *Chem. Eng. J.*, 2017, **326**, 1186–1196.

497 5 S. Cao, S. Wang, Y. Peng, C. Wu, R. Du, L. Gong and B. Ma, *Bioresour. Technol.*, 2013,  
498 **149**, 570–574.

- 499 6 R. Du, Y. Peng, S. Cao, B. Li, S. Wang and M. Niu, *Appl. Microbiol. Biotechnol.*, 2016, **100**,  
500 2011–2021.
- 501 7 S. Ge, Y. Peng, S. Wang, C. Lu, X. Cao and Y. Zhu, *Bioresour. Technol.*, 2012, **114**, 137–  
502 143.
- 503 8 W. Li, X.-Y. Lin, J.-J. Chen, C.-Y. Cai, G. Abbas, Z.-Q. Hu, H.-P. Zhao and P. Zheng, *Appl.*  
504 *Microbiol. Biotechnol.*, 2016, **100**, 10203–10213.
- 505 9 Z. Si, Y. Peng, A. Yang, S. Zhang, B. Li, B. Wang and S. Wang, *Environ. Sci.: Water Res.*  
506 *Technol.*, 2018, **4**, 80–86.
- 507 10 L. Russ, D. R. Speth, M. S. M. Jetten, H. J. M. Op den Camp and B. Kartal, *Environ.*  
508 *Microbiol.*, 2014, **16**, 3487–3498.
- 509 11 K. Hanaki, Z. Hong and T. Matsuo, *Water Sci. Technol.*, 1992, **26**, 1027–1036.
- 510 12 V. Baytshtok, H. Lu, H. Park, S. Kim, R. Yu and K. Chandran, *Biotechnol. Bioeng.*, 2009,  
511 **102**, 1527–1536.
- 512 13 D. Richardson, H. Felgate, N. Watmough, A. Thomson and E. Baggs, *Trends in*  
513 *Biotechnology*, 2009, **27**, 388–397.
- 514 14 J. van Rijn, Y. Tal and Y. Barak, *Appl. Environ. Microbiol.*, 1996, **62**, 2615–2620.
- 515 15 H. W. van Verseveld and A. H. Stouthamer, *Arch. Microbiol.*, 1978, **118**, 13–20.
- 516 16 J. Hinojosa, R. Riffat, S. Fink, S. Murthy, K. Selock, C. Bott, I. Takacs, P. Dold and R.  
517 Wimmer, in *Proceedings of the 81st Annual Water Environment Federation Technical*  
518 *Exposition and Conference*, Chicago, 2008, pp. 274–288.
- 519 17 T. Le, B. Peng, C. Su, A. Massoudieh, A. Torrents, A. Al-Omari, S. Murthy, B. Wett, K.  
520 Chandran, C. deBarbadillo, C. Bott and H. De Clippeleir, *Water Environ. Res.*, 2019, **91**,  
521 1455–1465.

- 522 18 Y. Mokhayeri, R. Riffat, S. Murthy, W. Bailey, I. Takacs and C. Bott, *Water Science &*  
523 *Technology*, 2009, **60**, 2485.
- 524 19 G. P. da Silva, M. Mack and J. Contiero, *Biotechnol. Adv.*, 2009, **27**, 30–39.
- 525 20 H. Lu and K. Chandran, *Environ. Sci. Technol.*, 2010, **44**, 8943–8949.
- 526 21 D. Güven, A. Dapena, B. Kartal, M. C. Schmid, B. Maas, K. van de Pas-Schoonen, S. Sozen,  
527 R. Mendez, H. J. M. Op den Camp, M. S. M. Jetten, M. Strous and I. Schmidt, *Appl.*  
528 *Environ. Microbiol.*, 2005, **71**, 1066–1071.
- 529 22 H. Park, A. C. Brotto, M. C. M. van Loosdrecht and K. Chandran, *Water Res.*, 2017, **111**,  
530 265–273.
- 531 23 American Public Health Association, *Standard Methods for the Examination of Water and*  
532 *Wastewater*, American Public Health Association, American Water Works Association,  
533 Water Environment Federation, Washington, DC, 23rd edn., 2017.
- 534 24 E. M. Contreras, N. C. Bertola, L. Giannuzzi and N. E. Zaritzky, *Water SA*, 2002, **28**, 463–  
535 468.
- 536 25 P. D. Schloss, S. L. Westcott, T. Ryabin, J. R. Hall, M. Hartmann, E. B. Hollister, R. A.  
537 Lesniewski, B. B. Oakley, D. H. Parks, C. J. Robinson, J. W. Sahl, B. Stres, G. G. Thallinger,  
538 D. J. V. Horn and C. F. Weber, *Appl. Environ. Microbiol.*, 2009, **75**, 7537–7541.
- 539 26 S. Chen, T. Huang, Y. Zhou, Y. Han, M. Xu and J. Gu, *BMC Bioinf.*, 2017, **18**, 91–100.
- 540 27 B. J. Callahan, P. J. McMurdie, M. J. Rosen, A. W. Han, A. J. A. Johnson and S. P. Holmes,  
541 *Nat. Methods*, 2016, **13**, 581–583.
- 542 28 J. G. Caporaso, J. Kuczynski, J. Stombaugh, K. Bittinger, F. D. Bushman, E. K. Costello, N.  
543 Fierer, A. G. Pena, J. K. Goodrich and J. I. Gordon, *Nat. Methods*, 2010, **7**, 335–336.
- 544 29 R. Du, Y. Peng, S. Cao, S. Wang and C. Wu, *Bioresour. Technol.*, 2015, **179**, 497–504.



- 545 30 P. L. McCarty, *Biotechnol. Bioeng.*, 2007, **97**, 377–388.
- 546 31 J. C. Akunna, C. Bizeau and R. Moletta, *Water Res.*, 1993, **27**, 1303–1312.
- 547 32 H. Constantin and M. Fick, *Water Res.*, 1997, **31**, 583–589.
- 548 33 H. Sun, Q. Yang, Y. Peng, X. Shi, S. Wang and S. Zhang, *Chin. J. Chem. Eng.*, 2009, **17**,
- 549 1027–1031.
- 550 34 R. Du, S. Cao, M. Niu, B. Li, S. Wang and Y. Peng, *Int. Biodeterior. Biodegrad.*, 2017, **122**,
- 551 38–46.
- 552 35 D. Güven, *Clean: Soil, Air, Water*, 2009, **37**, 565–573.
- 553 36 M. C. M. van Loosdrecht, M. A. Pot and J. J. Heijnen, *Water Sci. Technol.*, 1997, **35**, 41–47.
- 554 37 G. D. Drysdale, H. C. Kasan and F. Bux, *Water Sci. Technol.*, 2001, **43**, 147–154.
- 555 38 B. Liu, Y. Mao, L. Bergaust, L. R. Bakken and Å. Frostegård, *Environ. Microbiol.*, 2013, **15**,
- 556 2816–2828.
- 557 39 M. R. Betlach and J. M. Tiedje, *Appl. Environ. Microbiol.*, 1981, **42**, 1074–1084.
- 558 40 J. Dries, *Water Sci. Technol.*, 2015, **73**, 740–745.
- 559 41 L. Åmand, G. Olsson and B. Carlsson, *Water Sci. Technol.*, 2013, **67**, 2374–2398.
- 560 42 L. Gong, M. Huo, Q. Yang, J. Li, B. Ma, R. Zhu, S. Wang and Y. Peng, *Bioresour. Technol.*,
- 561 2013, **133**, 263–269.
- 562 43 Y. Z. Peng, J. F. Gao, S. Y. Wang and M. H. Sui, *Water Sci. Technol.*, 2002, **46**, 131–137.
- 563 44 C. P. L. Grady, G. T. Daigger, N. G. Love and C. D. M. Filipe, *Biological Wastewater*
- 564 *Treatment*, CRC Press, Boca Raton, FL, 3rd edn., 2011.
- 565 45 H. Lu, K. Chandran and D. Stensel, *Water Res.*, 2014, **64**, 237–254.
- 566 46 M. P. Ginige, J. Keller and L. L. Blackall, *Appl. Environ. Microbiol.*, 2005, **71**, 8683–8691.

- 567 47 C. Etchebehere, I. Errazquin, E. Barrandeguy, P. Dabert and R. Moletta, *FEMS Microbiol.*  
568 *Ecol.*, 2001, **35**, 259–265.
- 569 48 L. Bergaust, L. R. Bakken and Å. Frostegård, *Biochem. Soc. Trans.*, 2011, **39**, 207–212.
- 570 49 R. Du, S. Cao, B. Li, M. Niu, S. Wang and Y. Peng, *Water Res.*, 2017, **108**, 46–56.
- 571 50 T. R. Thomsen, Y. Kong and P. H. Nielsen, *FEMS Microbiol. Ecol.*, 2007, **60**, 370–382.
- 572 51 C. Glass and J. Silverstein, *Water Res.*, 1998, **32**, 831–839.
- 573

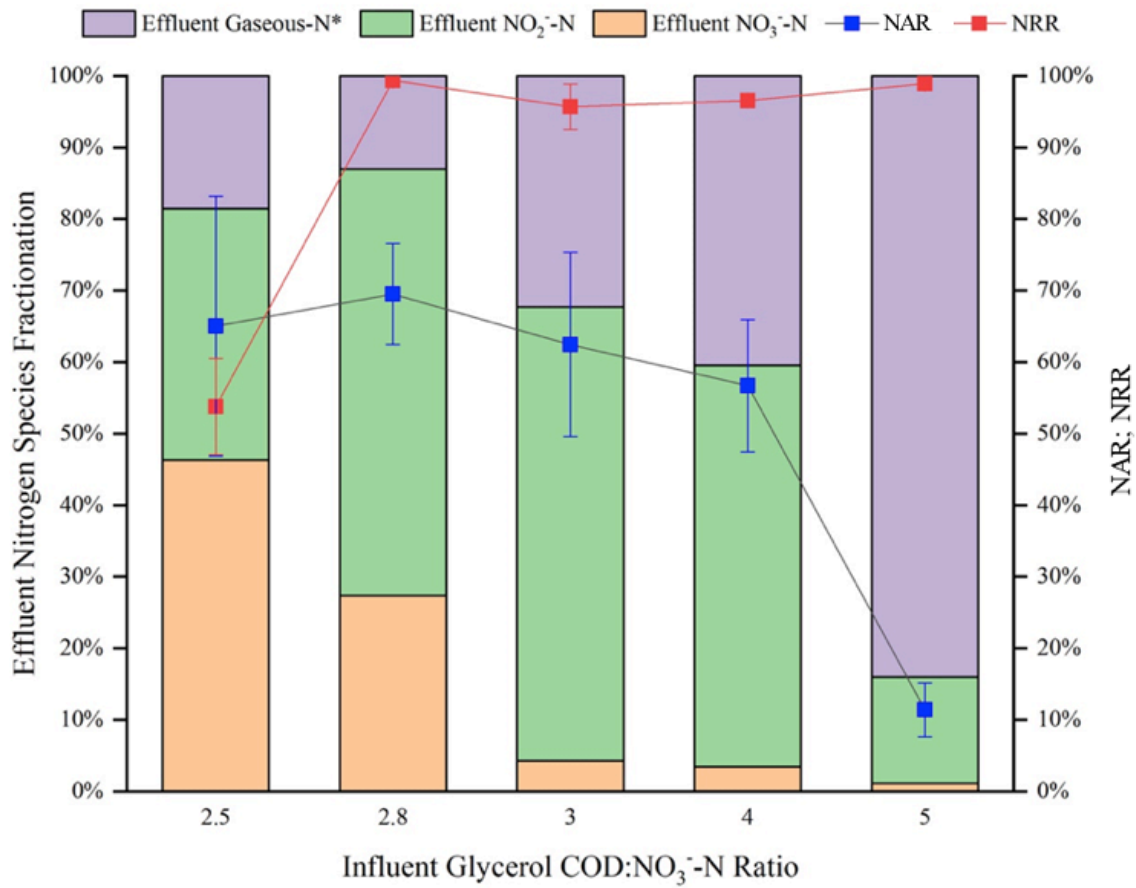

574

575 **Figure 1.** Steady-state denitratisation performance and respective NAR and NRR assessed at each  
576 influent COD:NO<sub>3</sub><sup>-</sup>-N ratio. \*Effluent gaseous-N contributions were calculated via mass balance.

577

578 **Table 1.** Influence of external COD source and influent COD:NO<sub>3</sub><sup>-</sup>-N ratios on denitratation  
 579 performance.

| External COD Source                  | Influent COD:NO <sub>3</sub> <sup>-</sup> -N | NAR [%] | NRR [%]  | Reactor Type     | Source     |
|--------------------------------------|----------------------------------------------|---------|----------|------------------|------------|
| Sodium Acetate                       | 3.0                                          | 51 – 73 | ~73 - 93 | USB <sup>a</sup> | 34         |
|                                      | 3.0                                          | 80      | ~100     | SBR              | 6          |
|                                      | 2.75                                         | 83      | ~100     |                  | 34         |
|                                      | 2.5                                          | 87      | 85       |                  | 9          |
| Sodium Acetate / Domestic Wastewater | 3.1 <sup>b</sup>                             | 90      | ~100     |                  | 4          |
| Fermentation Effluent                | 3.0                                          | 80      | ~100     |                  | 5          |
| Glycerol                             | 2.5                                          | 65      | 54       |                  | This study |
|                                      | 2.8                                          | 69      | 73       |                  |            |
|                                      | 3.0                                          | 62      | 96       |                  |            |
|                                      | 4.0                                          | 57      | 97       |                  |            |
|                                      | 5.0                                          | 10      | 99       |                  |            |

<sup>a</sup> Upflow sludge blanket reactor (USB)

<sup>b</sup> Reported influent ratio includes COD associated both with the domestic wastewater and external COD source

580

581

582 **Table 2.** Summary of process kinetic parameters for both full denitrification and denitratation  
 583 studies with respect to external COD source and influent COD:NO<sub>3</sub><sup>-</sup>-N ratio.

| COD Source                   | Inf. COD:NO <sub>3</sub> <sup>-</sup> -N | Inf. NO <sub>3</sub> <sup>-</sup> -N [mg N/L] | μ <sub>max</sub> [d <sup>-1</sup> ] | sDNaR <sup>h</sup> [mg N/g VSS/h] | sDNiR <sup>i</sup> [mg N/g VSS/h] | Source     |
|------------------------------|------------------------------------------|-----------------------------------------------|-------------------------------------|-----------------------------------|-----------------------------------|------------|
| Sodium Acetate               | 1.22                                     | 2,700                                         | --                                  | 23.0 <sup>f</sup>                 | 19.0 <sup>f</sup>                 | 51         |
|                              | 5.0                                      | 150                                           | --                                  | 82.3                              | 32.0                              | 6          |
|                              | 1.0                                      | --                                            | --                                  | 52.0                              | --                                | 7          |
|                              | 6.0                                      | --                                            | --                                  | 280.0                             | --                                |            |
| Sodium Acetate / Domestic WW | 3.4 <sup>e</sup>                         | 1,000                                         | --                                  | 190.0                             | --                                | 4          |
| Glycerol                     | 5.0                                      | 100                                           | --                                  | 6.5 <sup>a,d</sup>                |                                   | 20         |
|                              | 26.0                                     | 22.5                                          | 3.4                                 | 1.7 <sup>a,b</sup>                |                                   | 16         |
|                              | 26.0                                     | 22.5                                          | 2.0                                 | 1.35 <sup>a,c</sup>               |                                   |            |
|                              | 2.5                                      | 100                                           | --                                  | 112.3                             | 1.8                               | This Study |
|                              | 3.0                                      | 100                                           | --                                  | 135.3                             | 14.9                              |            |
|                              | 5.0                                      | 100                                           | --                                  | 147.1                             | 40.0                              |            |
|                              | 20.0 <sup>g</sup><br>(Unlimited)         | 100                                           | 6.2                                 | --                                | --                                |            |

<sup>a</sup> Rates reported as mg NO<sub>x</sub>-N/g VSS/hr based upon full denitrification studies.

<sup>b</sup> Rate reported in study exhibiting no NO<sub>2</sub><sup>-</sup> accumulation.

<sup>c</sup> Rate reported in study exhibiting NO<sub>2</sub><sup>-</sup> accumulation.

<sup>d</sup> Suspended phase rates reported; biofilm rates not reported for comparison purposes to current study.

<sup>e</sup> Reported influent ratio includes COD associated both with the domestic wastewater and external COD source.

<sup>f</sup> Rates reported from original study for the pH utilized in current study.

<sup>g</sup> Batch experiment used biomass acclimated to influent COD:NO<sub>3</sub><sup>-</sup>-N=3.0.

<sup>h</sup> Specific rate of NO<sub>3</sub><sup>-</sup> reduction (sDNaR)

<sup>i</sup> Specific rates of NO<sub>2</sub><sup>-</sup> reduction (sDNiR)

584

585

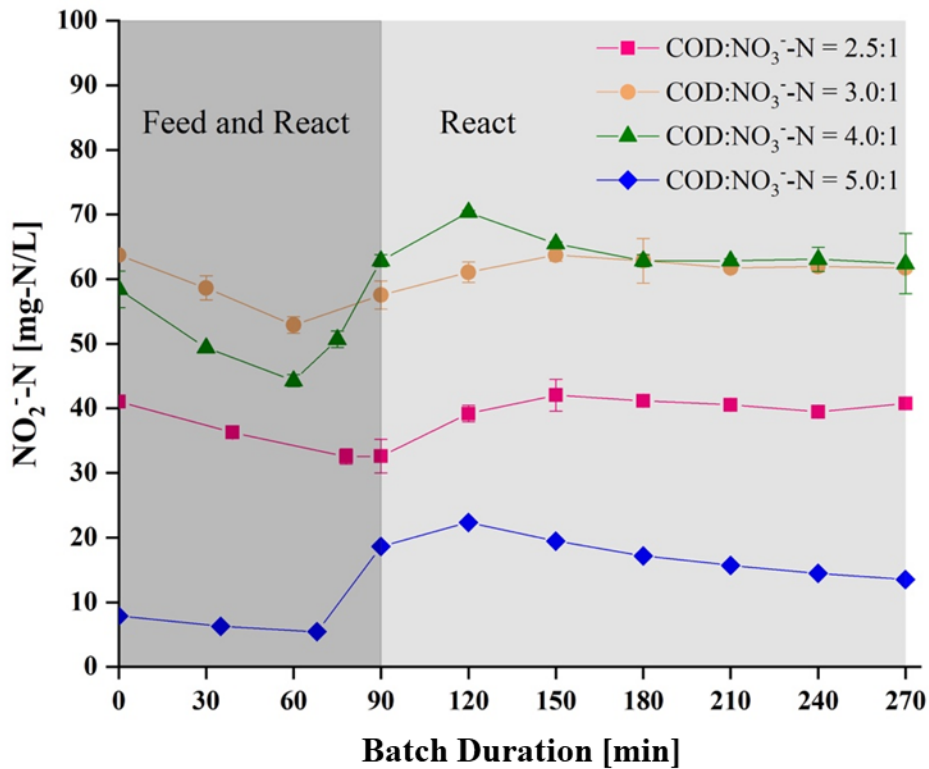

586

587 **Figure 2.** Representative *in situ*  $\text{NO}_2\text{-N}$  profiles identified the optimal batch duration obtained  
588 during steady-state operation at each respective influent  $\text{COD}:\text{NO}_3\text{-N}$  ratio. Optimal batch  
589 durations corresponded to the points of maximum  $\text{NO}_2\text{-N}$  accumulation at each respective influent  
590  $\text{COD}:\text{NO}_3\text{-N}$  ratio. Decreases in  $\text{NO}_2\text{-N}$  concentrations during the feed and react period were  
591 attributed to dilution.

592

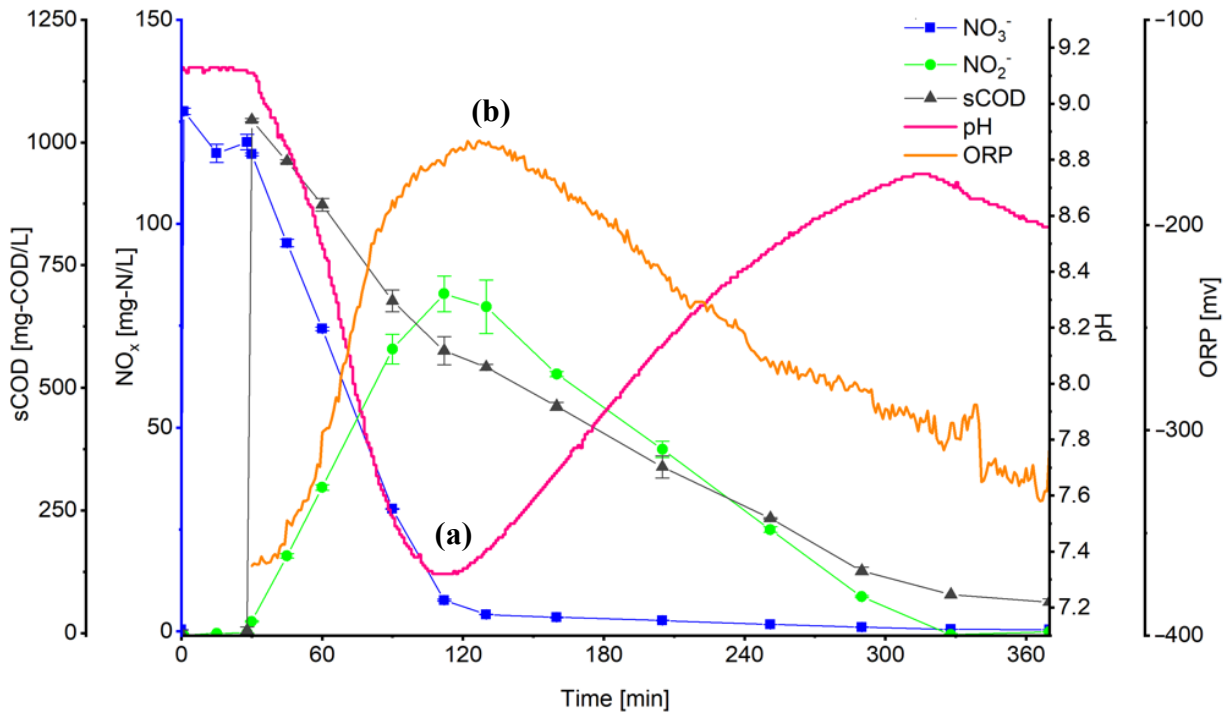

593

594 **Figure 3.**  $NO_x$ , pH, and ORP profiles depicting the pH (a) and ORP (b) inflection points at the  
595 point of maximum  $NO_2^-$  accumulation prior to which denitration was dominant and after which  
596 denitration became dominant (influent  $COD:NO_3^-:N=10.0:1$ ; microbial ecology acclimated to  
597 influent  $COD:NO_3^-:N=3.0:1$ ). Influent COD was provided in excess and beyond that at which  
598 biomass was acclimated in order to drive the process beyond denitration and demonstrate the  
599 ability of pH and ORP to serve as denitration process controls even under non-ideal influent  
600  $COD:NO_3^-:N$  ratios.

601

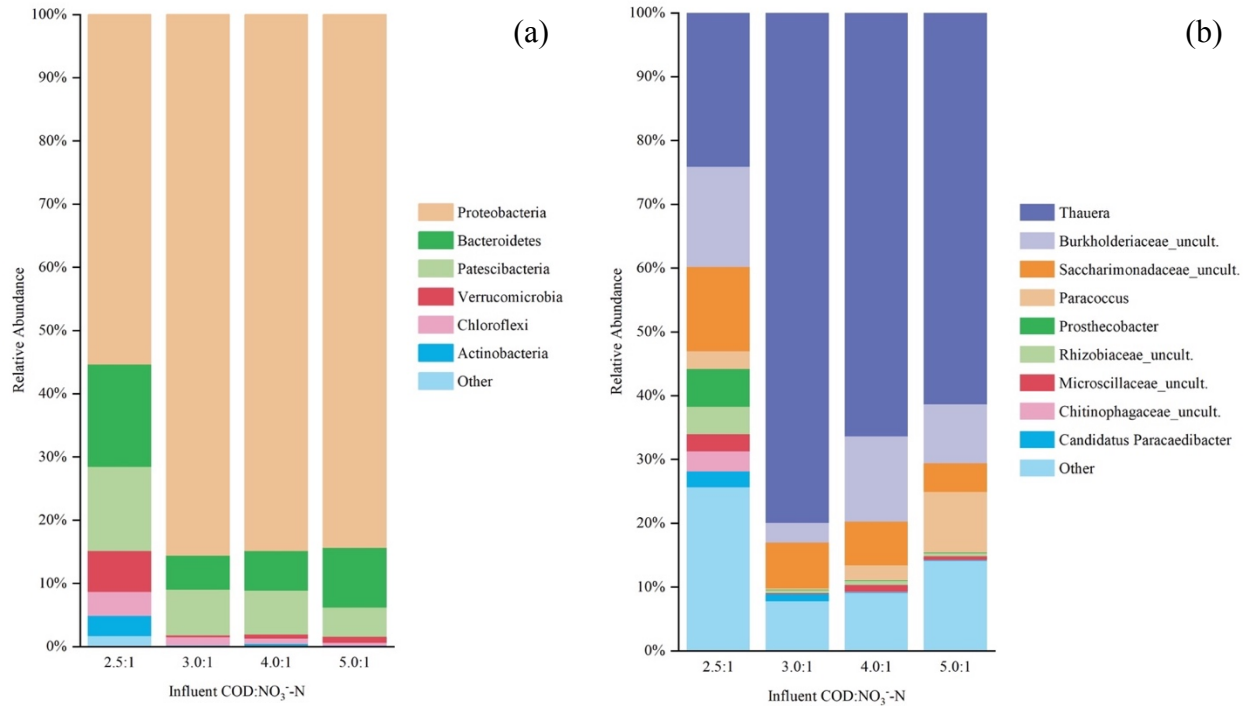

602

603 **Figure 4.** Taxonomic analysis of the microbial consortium at the phylum (a) and genus (b)

604 taxonomic levels under optimal operating conditions (influent COD:NO<sub>3</sub><sup>-</sup>-N=3.0:1, SRT=3 d).

605 The grouping “Other” comprises OTUs with less than 1% total relative abundance (among all

606 samples summed).

607
